# Supplementary material
Source: PubMed Central journal article supplement (PMC2874112)
Supplement: NIHMS199671-supplement-1_si_001.pdf [file NIHMS199671-supplement-1_si_001.pdf]

**Conjugate characterization.** The characterization of each conjugate follows below

**OHT-6C-BODIPY** 3 mg of the BODIPY FL conjugate was obtained after purification by preparative HPLC. *1H NMR* (500 MHz) ( $CD_3OD$ )  $\delta$  7.49 (1H, s),  $\delta$  7.15-6.98 (10H, m)  $\delta$  6.78 (1H, dd, J=7.4, 2.1 Hz)  $\delta$  6.30 (1H, t, J=3.7 Hz)  $\delta$  6.19 (1H, s)  $\delta$  6.37 (1H, d, J=8.5 Hz)  $\delta$  3.6 (4H, br s)  $\delta$  3.42 (2H, m)  $\delta$  3.20-3.15 (3H, m),  $\delta$  3.05 (1H, t, J=7.9 Hz)  $\delta$  3.00 (1H, t, J=7.9 Hz)  $\delta$  2.60-2.56 (2H, m)  $\delta$  2.48-2.42 (5H, m),  $\delta$  2.25 (3H, s)  $\delta$  1.75-1.61 (2H, m),  $\delta$  1.54-1.30 (7H, m),  $\delta$  0.88 (3H, t, J=7.33). Insufficient material was generated to obtain a  $^{13}C$  NMR. High Resolution ESI-MS calculated for  $C_{44}H_{51}BF_2N_4O_3$ , 732.4022; found, 732.4136

**OHT-6C-carboxyfluorescein** 2 mg of the carboxyfluorescein conjugate was obtained after purification by preparative HPLC. Insufficient material was recovered to acquire suitable NMR spectra. High Resolution ESI-MS calculated for  $C_{51}H_{48}N_2O_8$ , 816.3411; found (M+1), 817.3494

**OHT-6C-AF546** 1 mg of the AlexaFluor 546 conjugate was obtained after purification by preparative HPLC. Insufficient material was recovered to acquire suitable NMR spectra. ESI-MS calculated for  $C_{70}H_{80}Cl_3N_5O_{13}S_3$ : 1399; found (M+1), 1400.

OHT-6C-BODIPY  
1H NMR (500 MHz) in CD3OD

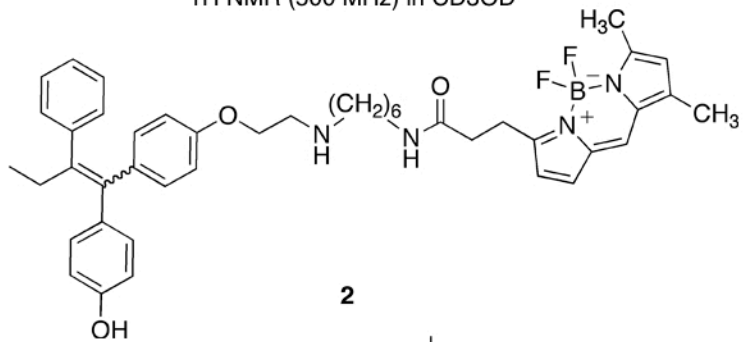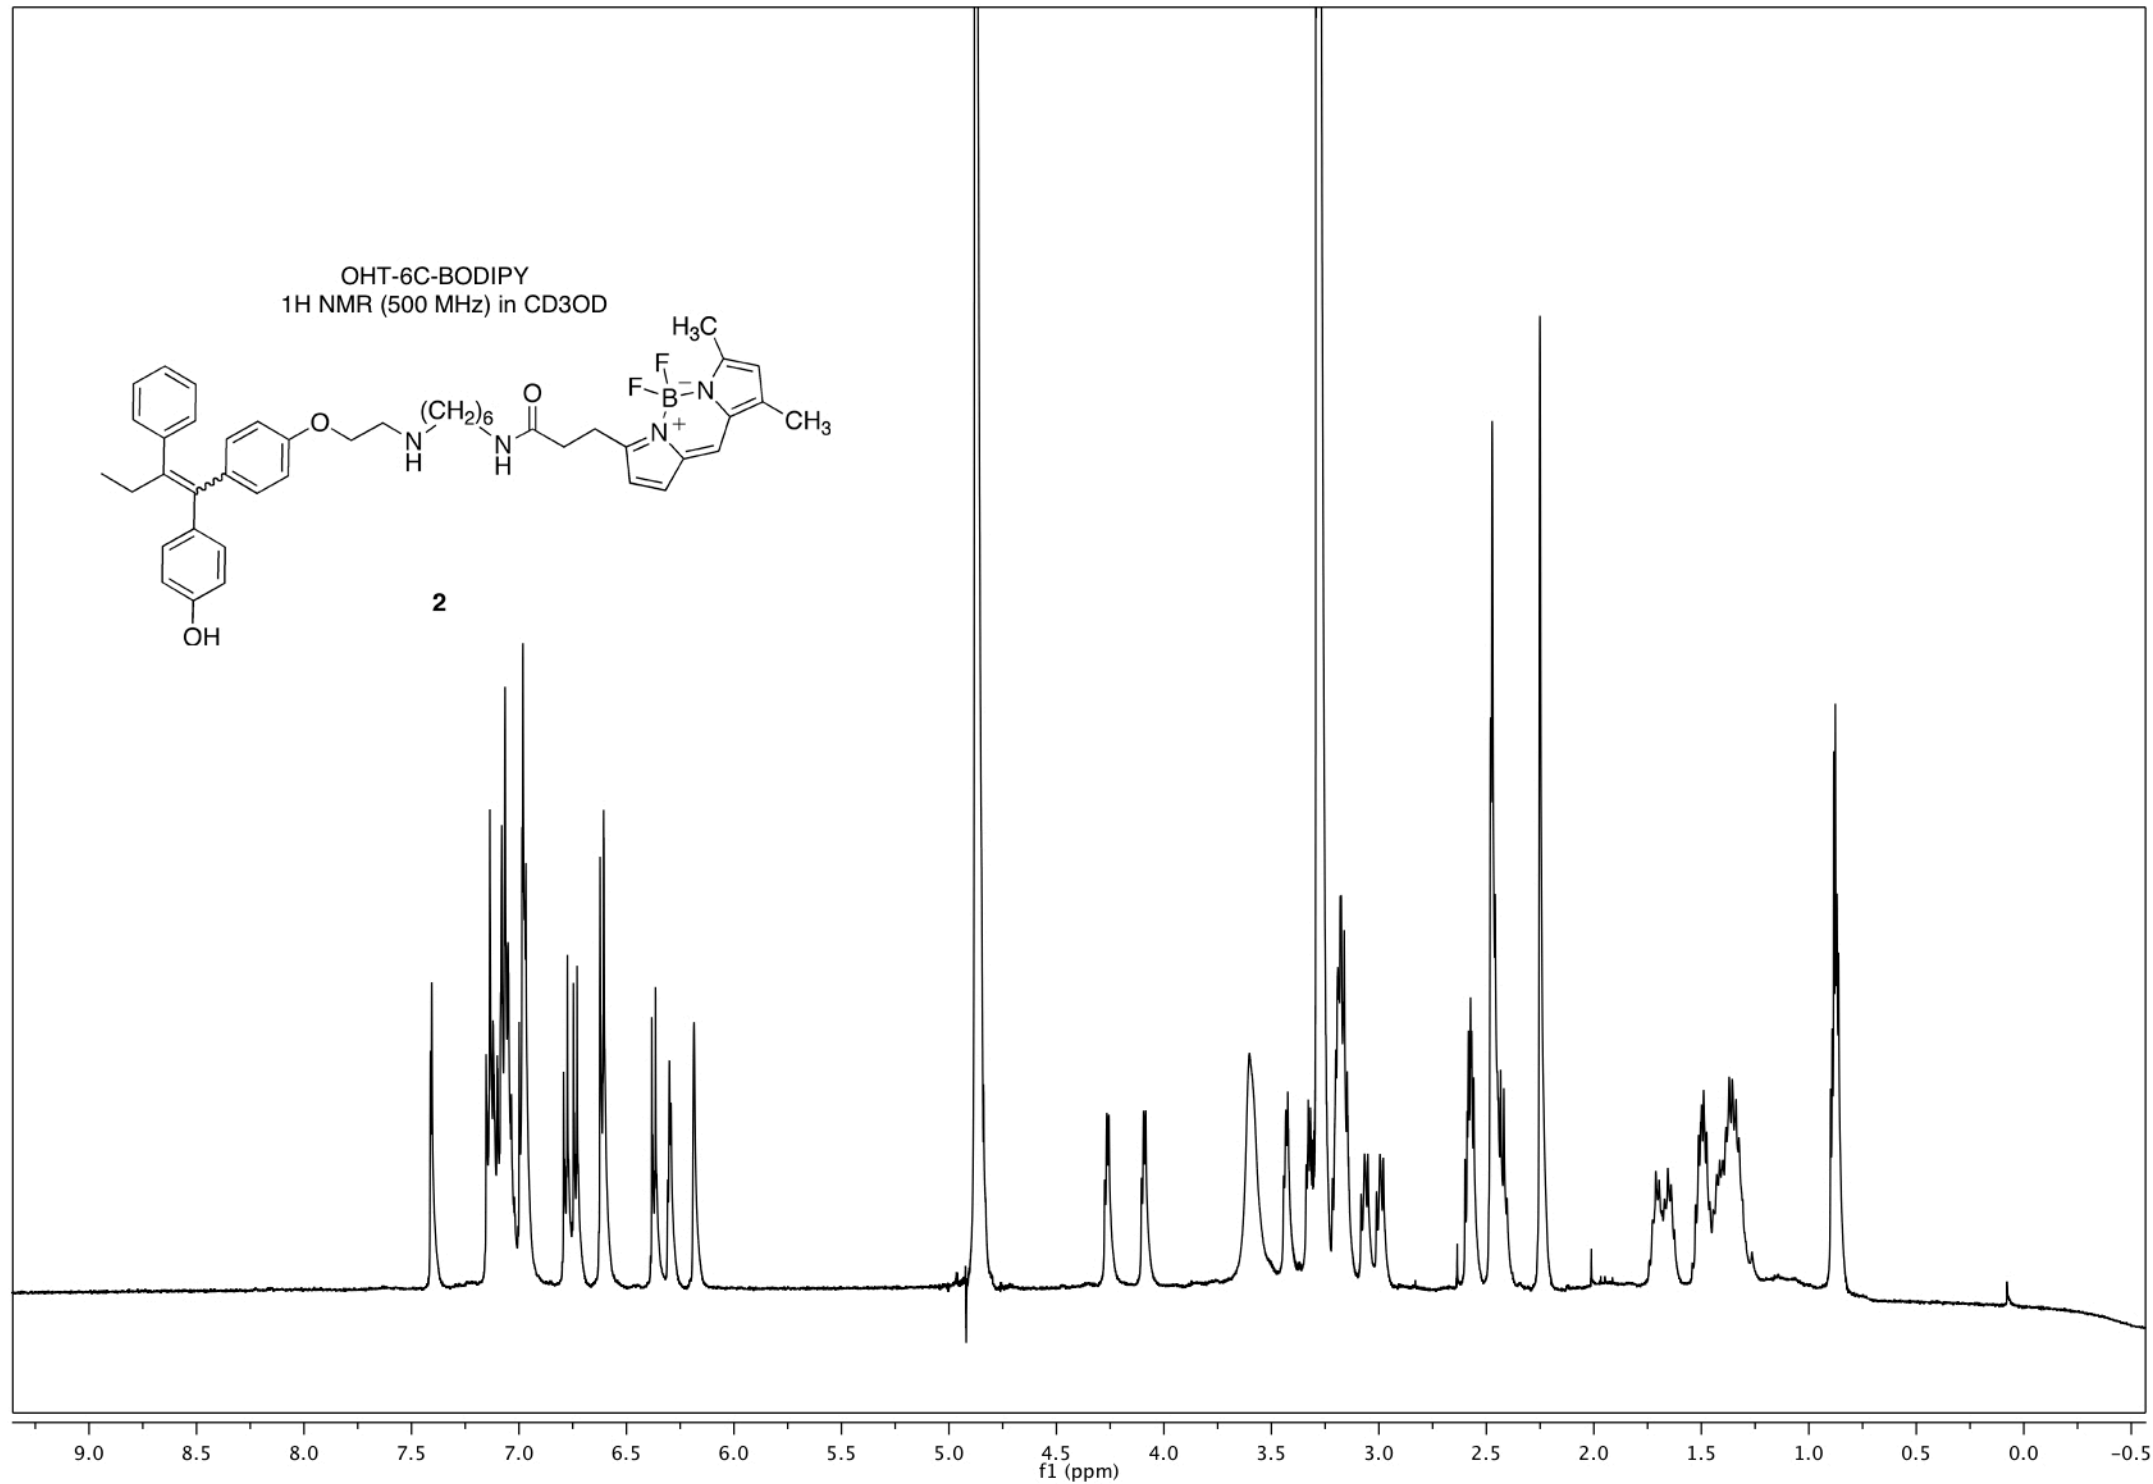

Figure S1.

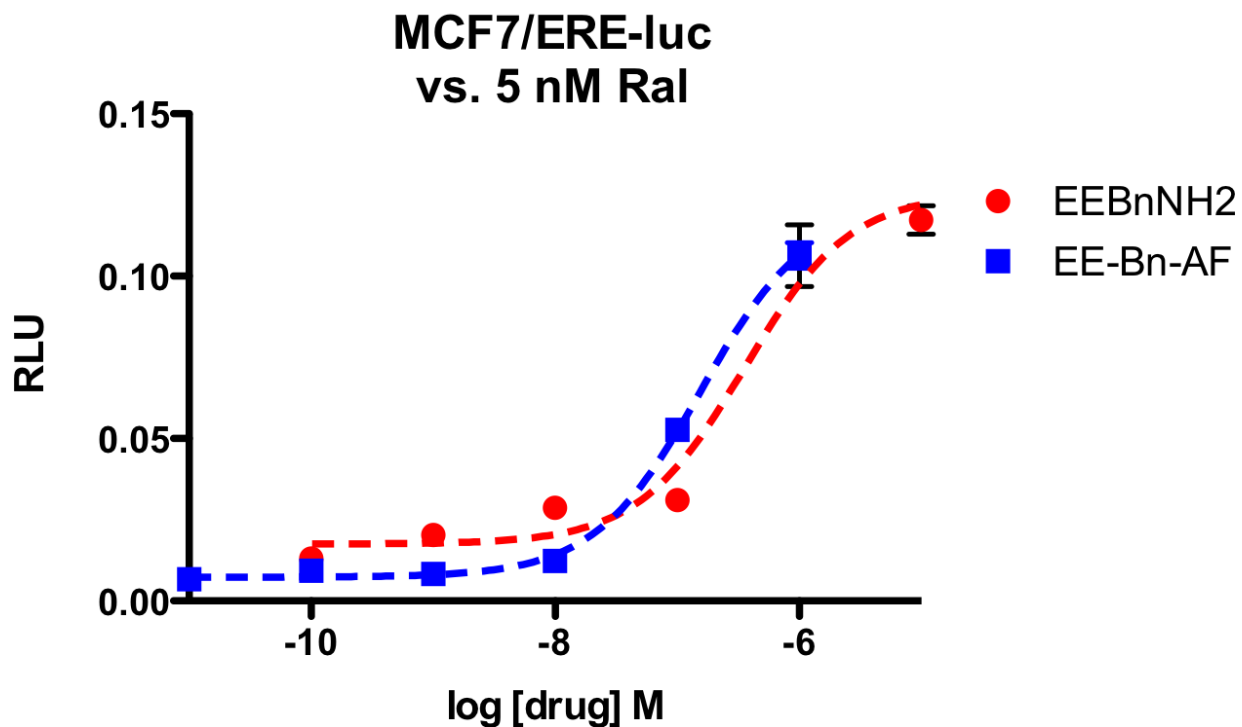

**Figure S1.** Effects of compounds on ER-mediated transcription in MCF7 cells transiently transfected with a luciferase reporter plasmid under the control of ERE-containing promoter. The drugs were added in the presence of 5 nM raloxifene. Luciferase activity was examined at 24 hours after drug treatment. Red circles= EE-Bn-NH<sub>2</sub> (see Scheme 2 in the main manuscript for structure). Blue squares=EE-Bn-AF

**Figure S2**

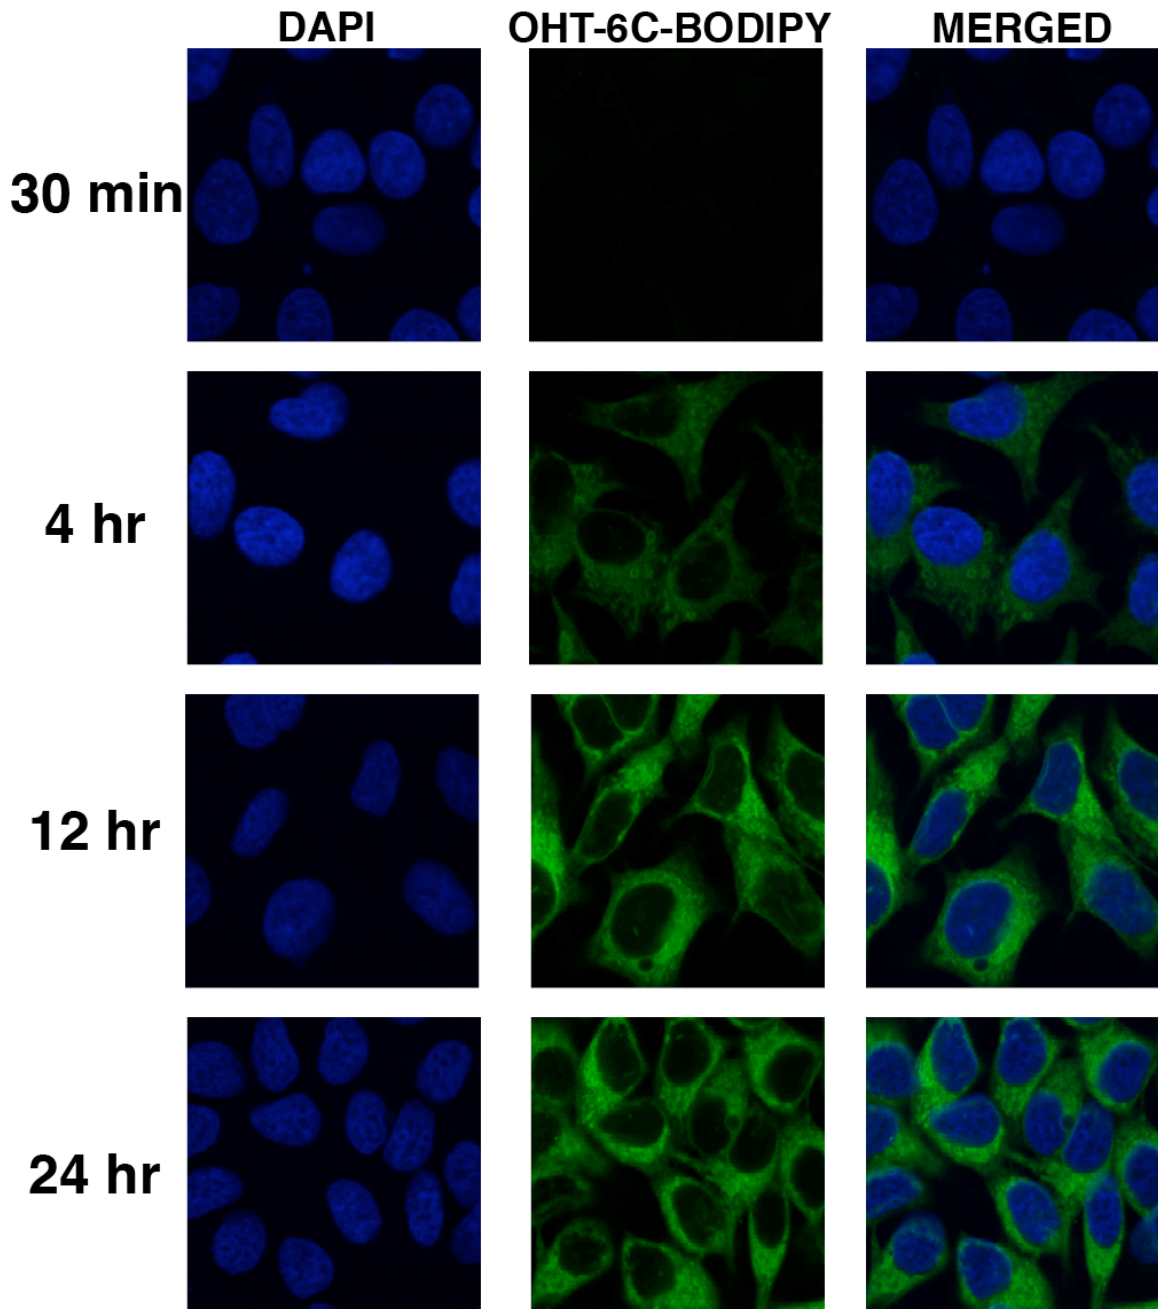

**Figure S2** Time course uptake of 1  $\mu$ M OHT-6C-BODIPY in MCF-7 cells. Left column represents the nuclear stain DAPI. The middle column represents the image obtained from OHT-6C-BODIPY. Right column shows the merged image of the two.

**Figure S3.**

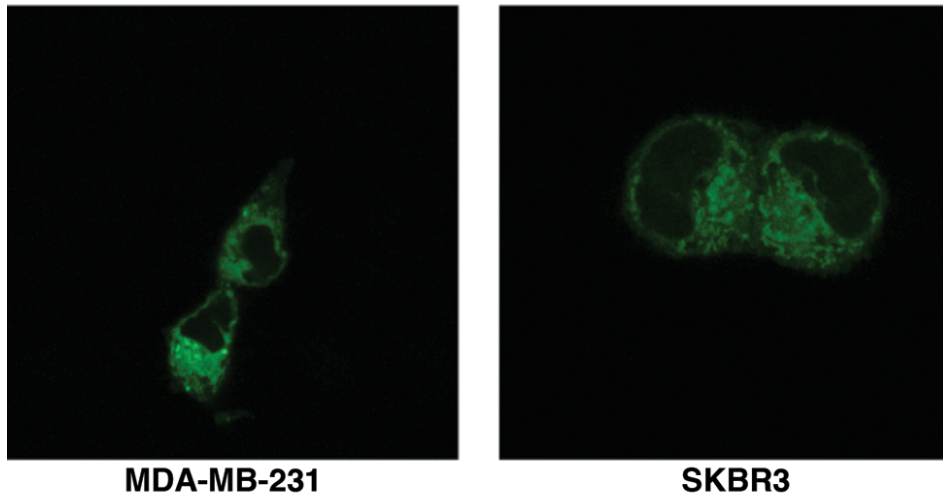

**Figure S3.** Images of the uptake of 100 nM OHT-6C-BODIPY by ER-negative MDA-MB-231 cells (left) and ER-negative SKBR3 cells (right) after 16 hours of dosing. The green represents the emission of the BODIPY fluorophore
